# Supplementary material for: Selective adhesive cell capture without molecular specificity: new surfaces exploiting nanoscopic polycationic features as discrete adhesive units
Source: Royal Society of Chemistry journal article supplement (doi:10.1039/c7ra01217a), 2017-01-01
Supplement: c7ra01217a1.pdf [file c7ra01217a1.pdf]

*Supporting Information for:*

## **Selective Adhesive Cell Capture without Molecular Specificity: New Surfaces Exploiting Nanoscopic Polycationic Features as Discrete Adhesive Units**

S. Kalasin,<sup>1</sup> E.P. Browne,<sup>2</sup> K.F. Arcaro,<sup>2</sup> and M. M. Santore<sup>1,\*</sup>

<sup>1</sup>Department of Polymer Science and Engineering  
120 Governors Drive  
Amherst, MA 01003

<sup>2</sup>Department of Veterinary and Animal Science  
240 Thatcher Road  
Amherst, MA 01003

\*Contact: [Santore@mail.pse.umass.edu](mailto:Santore@mail.pse.umass.edu)

### **Capture Behavior of F-TMX2-28 compared with that of TMX2-28**

Figure SI-1 shows the capture efficiencies for F-TMX2-28 (expressing green fluorescent protein) and TMX2-28 (regular). This data demonstrates that fluorescent expression does not influence cell capture on our collector surfaces, for the full range of compositions, justifying the use of fluorescent labeling to distinguish the TMX2-28 cells from the MCF-7 line in studies of selective capture from mixtures of the two.

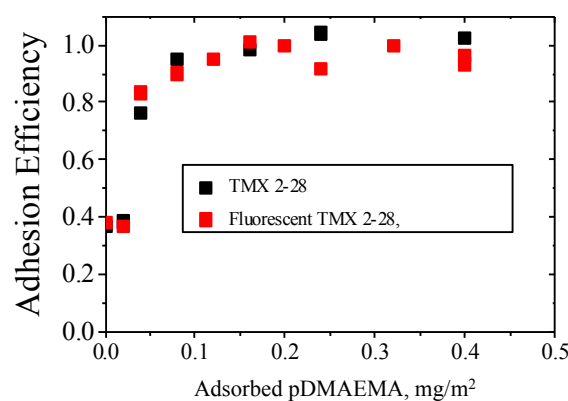

**Figure SI-1.** Comparison of capture efficiencies of TMX2-28 and F-TMX2-28 (which expresses green fluorescent protein) over the full range of collector compositions, in phosphate buffered saline (having  $\kappa^{-1} = 0.78$  nm.) The wall shear rate is  $22 \text{ s}^{-1}$ . The black points are averages of 2-3 runs.
